# Supplementary material for: Urine Fetuin-A is a biomarker of autosomal dominant polycystic kidney disease progression
Source: PubMed Central journal article supplement (PMC4416261; doi:10.1186/s12967-015-0463-7), 2015-03-30
Supplement: 12967_2015_463_MOESM1_ESM.pdf [file 12967_2015_463_MOESM1_ESM.pdf]

## Additional file 1: Figure S1

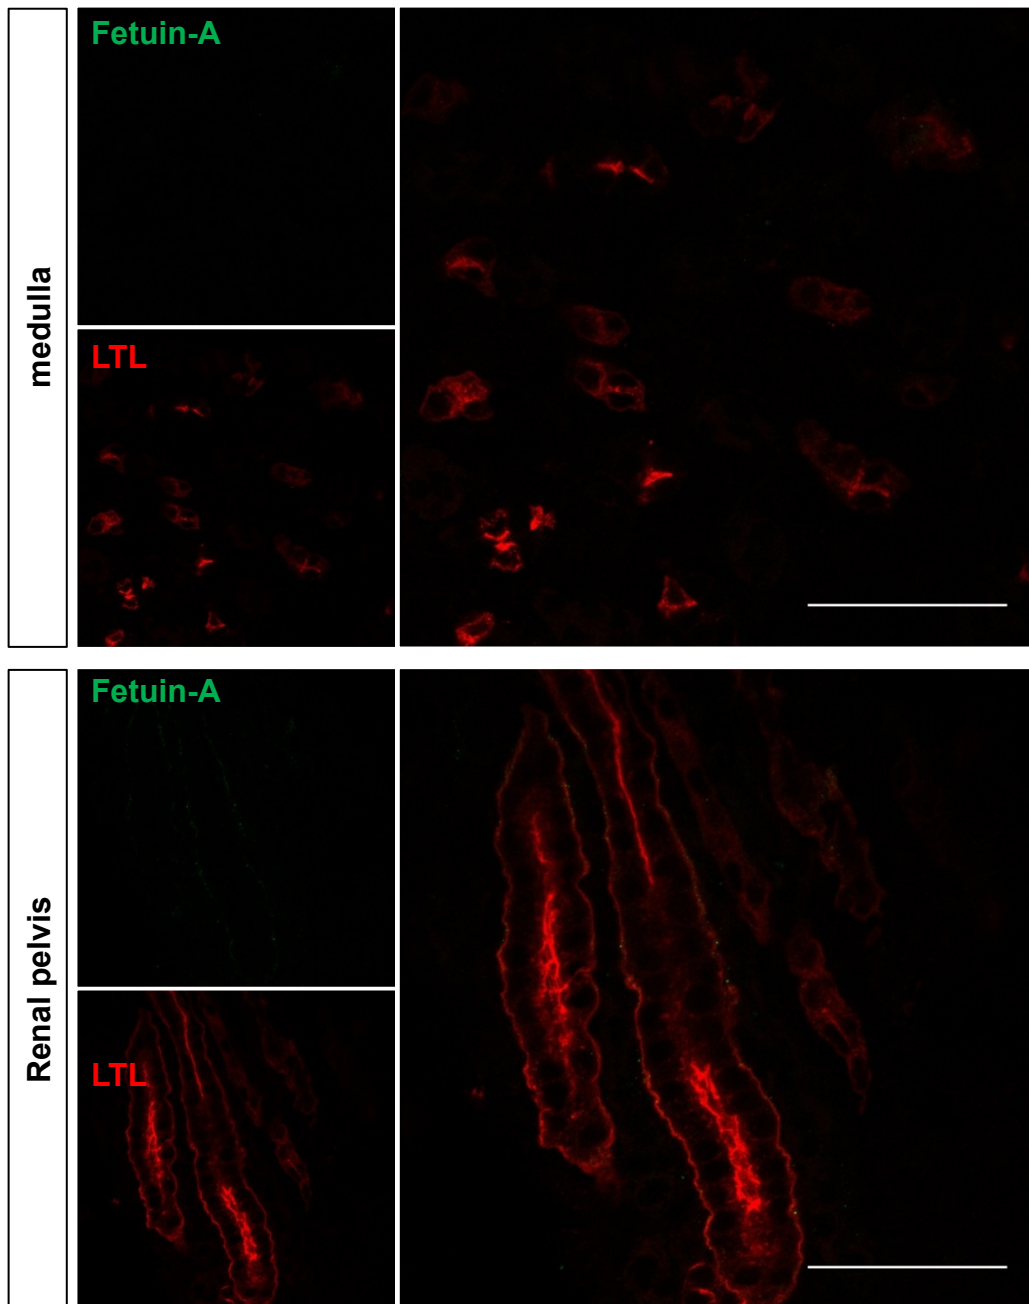

### Additional file 1: Figure S1. Absence of Fetuin-A staining in the medulla and in renal pelvis

Frozen sections of WT newborn kidneys labeled with anti-Fetuin-A antibody (green), and *Lotus tetragonolobus* lectin (LTL, red). Scale bars: 100  $\mu$ m.
