# Supplementary material for: Urine Fetuin-A is a biomarker of autosomal dominant polycystic kidney disease progression
Source: PubMed Central journal article supplement (PMC4416261; doi:10.1186/s12967-015-0463-7), 2015-03-30
Supplement: 12967_2015_463_MOESM3_ESM.pdf [file 12967_2015_463_MOESM3_ESM.pdf]

## Additional file 3: Figure S2

**a**

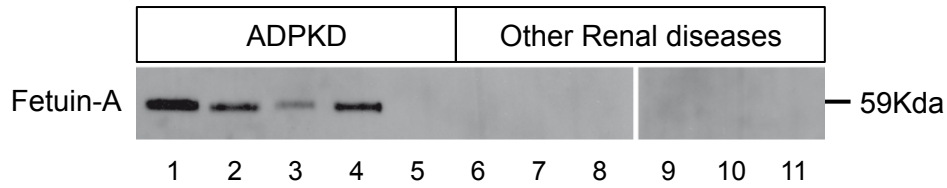

**b**

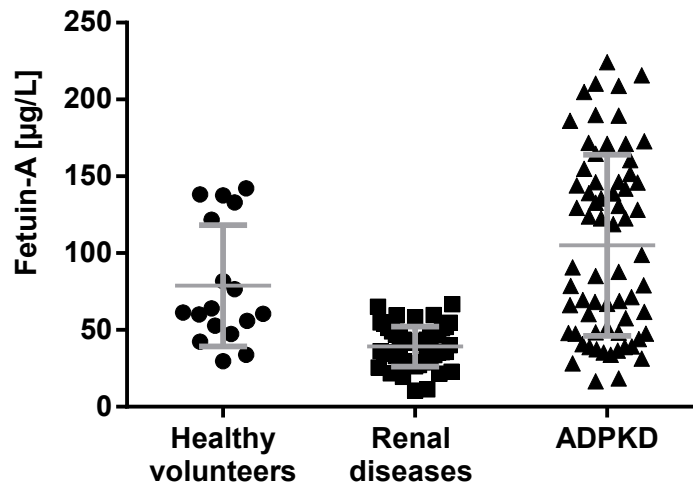

**c**

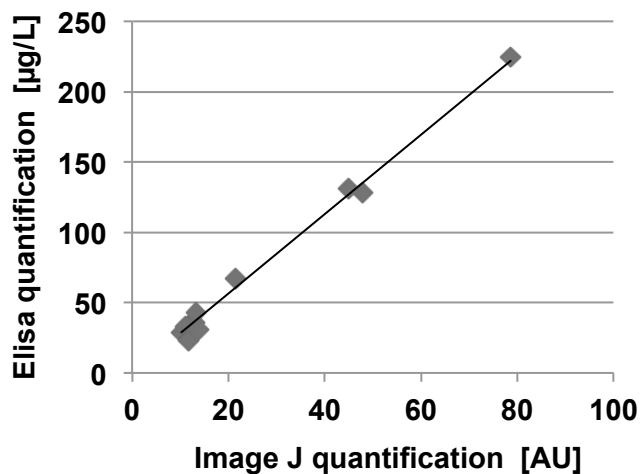

### Additional file 3. Figure S2. Fetuin-A expression levels in urine samples

(a) Western blot analysis of Fetuin-A in urine samples of ADPKD patients ( $n = 5$ ) and of patients with renal diseases other than ADPKD ( $n = 6$ ). (b) ELISA quantification of Fetuin-A levels in urine of ADPKD ( $n = 66$ ), healthy volunteers ( $n = 17$ ) and control patients with various renal diseases ( $n = 50$ ). Solid lines indicate mean. (c) Correlation between western blot and ELISA analyses. Line shows linear regression ( $r = 0.992$ ).
